# Supplementary material for: The diverse virulence potential of atypical enteropathogenic Escherichia coli isolated from diarrhea: the emergence of a hybrid pathotype?
Source: Front Microbiol. 2025 Jun 6;16:1599350. doi: 10.3389/fmicb.2025.1599350 (PMC12179130; doi:10.3389/fmicb.2025.1599350)
Supplement: Supplementary file 2 [file Data_Sheet_2.xlsx]

## Sheet: patric3_query
Table S5 - Metadata of Escherichia coli similar genomes used to build phylogenetic tree
Genome Name	Strain	Serovar	BioSample Accession	Assembly Accession	SRA Accession	GenBank Accessions	Contigs	Size	Collection Year	Geographic Location	Host Name	Host Common Name	Host Gender	Host Health
Escherichia coli C2139_99	C2139_99		SAMN02435938	GCA_000446285.1		AIAM00000000	153	4841865		Denmark	Human, Homo sapiens	Human
Escherichia coli C347_93	C347_93		SAMN02435905	GCA_000446445.1		AIAU00000000	405	4989757		Thailand	Human, Homo sapiens	Human
Escherichia coli C725_88	C725_88		SAMN02436011	GCA_000446765.1		AIBL00000000	252	4914599		Germany	Human, Homo sapiens	Human
Escherichia coli C79_08	C79_08		SAMN02435993	GCA_000446865.1		AIBQ00000000	407	4792825		Slovenia	Human, Homo sapiens	Human
Escherichia coli C80_08	C80_08		SAMN02435912	GCA_000446945.1		AIBU00000000	284	4909364		Slovenia	Human, Homo sapiens	Human
Escherichia coli C824_10	C824_10		SAMN02435995	GCA_000447005.1		AIBX00000000	302	5014744		Denmark	Human, Homo sapiens	Human
Escherichia coli KTE142	KTE142		SAMN00854674	GCF_000351925.1	SRR640020,SRR640079,SRR641804,SRR642284	ANVA00000000	17	5031151	2010	Denmark	Human, Homo sapiens	Human	female
Escherichia coli O39:NM str. F8704-2	F8704-2		SAMN02353134	GCA_000618905.1		JHHJ00000000	236	5291822		United States
Escherichia coli O26:H11 strain PV520	PV520	O26:H11	SAMD00075913	GCA_002766795.1		BEPZ00000000	195	5307912	1998	Japan:Osaka	Human, Homo sapiens	Human
Escherichia coli O26:H11 strain PV542	PV542	O26:H11	SAMD00075914	GCA_002766815.1		BEQA00000000	252	5295182	1998	Japan:Osaka	Human, Homo sapiens	Human
Escherichia coli O26:H11 strain 98E4	98E4	O26:H11	SAMD00075786	GCA_002764555.1		BELC00000000	281	5305244	1998	Japan:Fukuoka	Human, Homo sapiens	Human
Escherichia coli E110019	E110019	serovar O111	SAMN02435896	GCA_000167875.1		AAJW00000000	137	5376211	1987	Finland	Human, Homo sapiens	Human
Escherichia coli CNTRL_EPEC49	CNTRL_EPEC49	O33:H6,12	SAMN11231313	GCA_022764755.1		SQON00000000	30	4705213		Denmark	Homo sapiens	Human		healthy control
Escherichia coli CNTRL_EPEC42	CNTRL_EPEC42	O179:H31	SAMN11231306	GCA_022764905.1		SQOU00000000	37	4828383		Denmark	Homo sapiens	Human		healthy control
Escherichia coli CNTRL_EPEC40	CNTRL_EPEC40	O39,70:H11	SAMN11231304	GCA_022764945.1		SQOW00000000	165	5070442		Denmark	Homo sapiens	Human		healthy control
Escherichia coli IBD_EPEC9	IBD_EPEC9	O26:H11	SAMN11231273	GCA_022765545.1		SQQB00000000	213	5223907		Austria	Homo sapiens	Human		ulcerative colitis
Escherichia coli IBD_EPEC5	IBD_EPEC5	O33:H6	SAMN11231269	GCA_022765605.1		SQQF00000000	44	4800337		Austria	Homo sapiens	Human		ulcerative colitis
Escherichia coli strain MOD1-EC1394	MOD1-EC1394	O86:H34	SAMN05591681	GCA_002461625.1		NJWG00000000	235	5013820	1991	USA: WA	Human, Homo sapiens	Human
Escherichia coli strain MOD1-EC1383	MOD1-EC1383	O111:NM	SAMN05591690	GCA_002461715.1		NKAI00000000	361	5077990	1983	Peru	Human, Homo sapiens	Human
Escherichia coli strain MOD1-EC1380	MOD1-EC1380	O111:H9	SAMN05591691	GCA_002462235.1		NJWI00000000	358	5151556	1987	Finland	Human, Homo sapiens	Human
Escherichia coli strain MOD1-EC6374	MOD1-EC6374	O37:H31	SAMN04992991	GCA_002513875.1		NLYW00000000	157	4794753	1988	USA: PA	Sheep, Ovis aries	Sheep
Escherichia coli strain MOD1-EC5939	MOD1-EC5939	O139:H7	SAMN05439353	GCA_002544725.1		NMHI00000000	76	4758122	1985	USA:FL	Cat, Felis catus	Cat
Escherichia coli strain MOD1-EC6793	MOD1-EC6793		SAMN04992141	GCA_002521745.1		NORN00000000	234	4942935	1994	USA: PA	Bos taurus	Cow
Escherichia coli strain PA58	PA58	O137:H6	SAMN07958597	GCA_002797055.1		PEKZ00000000	149	4902402	2013	Brazil: Sao Paulo	Melopsittacus undulatus			healthy
Escherichia coli strain MOD1-EC2407	MOD1-EC2407		SAMN05605370	GCA_002515045.1		NJXF00000000	418	5312030	2012	USA: MI	Bos taurus	Cow
Escherichia coli strain VREC0444	VREC0444		SAMEA3472115	GCA_900479335.1		UCWU00000000	33	4737526	2015	United Kingdom	Bos taurus	Cow
Escherichia coli strain SC305	SC305		SAMN08462928	GCA_003358975.1		QOOQ00000000	91	4682689	2005	USA: St. Louis Clyde watershed of Lake Superior
Escherichia coli strain NCTC9098	NCTC9098	O98:H8	SAMEA3451126	GCA_900449855.1		UGDP00000000	4	5344836
Escherichia coli strain NCTC8783	NCTC8783	O26 : K60(b6) : H11	SAMEA3505369	GCA_900450195.1		UGFY00000000	4	5606282	1950	United Kingdom: Liverpool	Human, Homo sapiens	Human
Escherichia coli strain 365854	365854	Escherichia coli	SAMN09387744	GCA_003884295.1		RTKF00000000	317	5124097	2017	United Kingdom: United Kingdom	Human, Homo sapiens	Human
Escherichia coli strain URMC_192	URMC_192		SAMN10625671	GCA_004567855.1		RZDH00000000	123	4701329	2018	USA: Rochester, NY	Human, Homo sapiens	Human		urinary tract infection
Escherichia coli strain JML142	JML142		SAMD00077235	GCA_005387285.1		BFQW00000000	144	4731911	2015	Japan	Human, Homo sapiens	Human
Escherichia coli strain JML151	JML151		SAMD00077244	GCA_005387465.1		BFRF00000000	202	4721219	2015	Japan	Human, Homo sapiens	Human
Escherichia coli strain JML235	JML235		SAMD00077310	GCA_005388845.1		BFTT00000000	228	4986148	2015	Japan	Human, Homo sapiens	Human
Escherichia coli strain KK-P011	KK-P011		SAMD00077393	GCA_005390485.1		BFWX00000000	263	5334005	2014	Japan	Bos taurus	Cow
Escherichia coli strain KK-P041	KK-P041		SAMD00077408	GCA_005390785.1		BFXM00000000	296	5378965	2014	Japan	Bos taurus	Cow
Escherichia coli strain KK-P060	KK-P060		SAMD00077419	GCA_005391005.1		BFXX00000000	333	5395853	2014	Japan	Bos taurus	Cow
Escherichia coli strain 74-B166-80-1	74-B166-80-1		SAMD00148641	GCA_005400905.1		BIEE00000000	217	5391048	2018	France	Bos taurus	Cow
Escherichia coli strain EEPERB100	EEPERB100		SAMN11232683	GCA_006231435.1		SPZV00000000	297	4614508	2012	Estonia	Human, Homo sapiens	Human
Escherichia coli strain Fecal samples	Fecal samples	O85:H31 / 803 (ST Warwick)	SAMEA6061890	GCA_902505215.1		CABWIQ000000000	248	4676473	2000	Sweden	Human, Homo sapiens	Human
Escherichia coli upec-202	upec-202		SAMN02802023	GCA_000779295.1	SRR1314426	JSLJ00000000	58	4794340	2011	USA: WA	Human, Homo sapiens	Human
Escherichia coli strain 24742_1#324	24742_1#324		ERS1995120				156	4929750
Escherichia coli strain 24742_1#155	24742_1#155		ERS1995133				156	4933170
Escherichia coli strain AMC_289	AMC_289		SAMN13024424		SRR10271663		97	4861604		Oxford	Human, Homo sapiens	Human
Escherichia coli strain FHI_NMBU_08	FHI_NMBU_08	O137:H6	SAMN13793589	GCA_015687475.1		JAAALJ000000000	32	4842566	2012	Norway	Human, Homo sapiens	Human		Diarrhea
Escherichia coli strain K5-1	K5-1		SAMN12738462	GCA_015912765.1		VXDG00000000	209	5377985	2015	USA:North Carolina	Cat, Felis catus	Cat		asymptomatic
Escherichia coli strain BA1250	BA1250		SAMN16818244	GCA_016786245.1		JADPBX000000000	139	4962717	2003	Brazil: Bahia	Homo sapiens	Human		Diarrhea
Escherichia coli strain FHI8	FHI8	86	SAMEA2593895	GCF_000941395.1			51	5502792	2004	Norway	Human, Homo sapiens	Human
Escherichia coli strain EP021	EP021		SAMN08397836	GCA_017117165.1		PQOY00000000	238	5068671	2011	China:Henan	Homo sapiens	Human		diarrhea
Escherichia coli strain EP033	EP033		SAMN08397839	GCA_017117205.1		PQPB00000000	85	4811789	2011	China:Henan	Homo sapiens	Human		diarrhea
Escherichia coli strain EP074	EP074		SAMN08398251	GCA_017117425.1		PQPK00000000	64	4900479	2011	China:Henan	Homo sapiens	Human		diarrhea
Escherichia coli strain EP096	EP096		SAMN08398258	GCA_017117515.1		PQPR00000000	159	5104591	2011	China:Henan	Homo sapiens	Human		diarrhea
Escherichia coli strain EP084	EP084		SAMN08398255	GCA_017117465.1		PQPO00000000	207	5162040	2011	China:Henan	Homo sapiens	Human		diarrhea
Escherichia coli strain EP355	EP355		SAMN08398411	GCA_017118085.1		PQRR00000000	88	4842015	2014	China:Guangdong	Homo sapiens	Human		diarrhea
Escherichia coli strain EP367	EP367		SAMN08398417	GCA_017118165.1		PQRX00000000	44	4723874	2014	China:Anhui	Homo sapiens	Human		diarrhea
Escherichia coli strain EP239	EP239		SAMN08398390	GCA_017118365.1		PQQW00000000	211	5273995	2013	China:Guangdong	Homo sapiens	Human		diarrhea
Escherichia coli strain EP318	EP318		SAMN08398405	GCA_017118895.1		PQRL00000000	55	4785880	2013	China:Guangdong	Homo sapiens	Human		diarrhea
Escherichia coli strain EP359	EP359		SAMN08398414	GCA_017119075.1		PQRU00000000	66	4817900	2014	China:Guangdong	Homo sapiens	Human		diarrhea
Escherichia coli strain EP371	EP371		SAMN08398418	GCA_017119185.1		PQRY00000000	157	4967581	2013	China:Anhui	Homo sapiens	Human		diarrhea
Escherichia coli strain EP396	EP396		SAMN08398424	GCA_017119305.1		PQSE00000000	283	5011045	2015	China:Sichuan	Homo sapiens	Human		diarrhea
Escherichia coli strain 192161DA	192161DA		SAMN18151939	GCA_017356185.1		JAFMZY000000000	420	5407132	2019	France: Paris	Homo sapiens	Human		Carrier
Escherichia coli strain 102929	102929		SAMN02640717	GCF_001265685.1		JHRX00000000	147	5240791		Gambia	Human, Homo sapiens	Human
Escherichia coli strain 302137	302137		SAMN02640745	GCF_001266225.1		JHSZ00000000	44	5101303		Mozambique	Human, Homo sapiens	Human
Escherichia coli strain 200959_aEPEC	200959_aEPEC		SAMEA1466146	GCA_001283765.1	ERR137813	CYCZ00000000	274	5323410	2008	West Africa	Human, Homo sapiens	Human
Escherichia coli strain 403308_aEPEC	403308_aEPEC		SAMEA1466151	GCA_001284505.1	ERR134538	CYAZ00000000	327	5093020	2010	East Africa	Human, Homo sapiens	Human
Escherichia coli strain 702890_aEPEC	702890_aEPEC		SAMEA1466116	GCA_001284525.1	ERR137805	CYCQ00000000	271	5216214	2009	Asia	Human, Homo sapiens	Human
Escherichia coli strain 504225_aEPEC	504225_aEPEC		SAMEA1466200	GCA_001284725.1	ERR134548	CXZC00000000	57	4796697	2010	Asia	Human, Homo sapiens	Human
Escherichia coli strain 504180	504180		SAMEA1531005	GCA_001284885.1	ERR178166	CYDM00000000	259	5220332	2009	Asia	Human, Homo sapiens	Human
Escherichia coli strain 503331	503331		SAMEA1530999	GCA_001285245.1	ERR178165	CYDI00000000	224	5149753	2009	Asia	Human, Homo sapiens	Human
Escherichia coli strain R302583-2A	R302583-2A		SAMEA1527985	GCA_001285485.1	ERR175738	CYGF00000000	200	5300706		East Africa	Human, Homo sapiens	Human
Escherichia coli strain HECR17	HECR17		SAMN19607847	GCA_019282105.1		JAHVMG000000000	224	4953345	2020	USA: Maine	Homo sapiens	Human		Urinary tract infection
Escherichia coli strain 505513_aEPEC	505513_aEPEC		SAMEA1466103	GCA_001285865.1	ERR124656	CYAX00000000	282	5254641	2010	Asia	Human, Homo sapiens	Human
Escherichia coli strain 402635	402635		SAMEA1531064	GCA_001285965.1	ERR178157	CYDF00000000	194	5192192	2009	East Africa	Human, Homo sapiens	Human
Escherichia coli strain 503947_aEPEC	503947_aEPEC		SAMEA1466110	GCA_001286145.1	ERR124654	CYAW00000000	281	5267507	2009	Asia	Human, Homo sapiens	Human
Escherichia coli strain 703975_aEPEC	703975_aEPEC		SAMEA1466117	GCA_001286205.1	ERR134560	CYBE00000000	304	5174594	2010	Asia	Human, Homo sapiens	Human
Escherichia coli strain 500094	500094		SAMEA1531063	GCA_001286445.1	ERR178207	CYFK00000000	281	5231302	2008	Asia	Human, Homo sapiens	Human
Escherichia coli strain 100600_aEPEC	100600_aEPEC		SAMEA1466098	GCA_001286465.1	ERR134515	CYGH00000000	28	4787944	2008	West Africa	Human, Homo sapiens	Human
Escherichia coli strain 703108	703108		SAMEA1531059	GCA_001286485.1	ERR178187	CYGI00000000	44	4783406	2010	Asia	Human, Homo sapiens	Human
Escherichia coli strain 155388	155388		SAMEA1531051	GCF_001286565.1	ERR178190	CYGK00000000	30	4735525		Australia: Melbourne	Human, Homo sapiens	Human
Escherichia coli strain R811	R881		SAMD00031374	GCF_001297725.1		BBYP00000000	386	5444686	2012	Japan: Kawasaki	White-tufted-ear marmoset, Callithrix jacchus	White-Tufted-Ear Marmoset
Escherichia coli strain STEC283 strain not applicable	not applicable		SAMN15722256			JACINU000000000	202	5162204	2012	China: Heilongjiang	cattle	Cow
Escherichia coli strain ARS-CC11325	ARS-CC11325		SAMN21542757	GCA_021108825.1		JAJODX000000000	641	5188806	2015	USA	Bos taurus	Cow
Escherichia coli aEPEC 0811-4	aEPEC 0811-4		SAMN30438959	GCA_041890435.1		JANWGP000000000	338	5328743	1989	Brazil	Human, Homo sapiens	Human		Diarrhea
Escherichia coli aEPEC 1551-3	aEPEC 1551-3		SAMN30438917	GCA_041890445.1		JANWGQ000000000	281	5066720	1989	Brazil	Human, Homo sapiens	Human		Diarrhea
Escherichia coli aEPEC 3712-3	aEPEC 3712-3		SAMN30439284	GCA_041890475.1		JANWGR000000000	57	4784160	1989	Brazil	Human, Homo sapiens	Human		asymptomatic
Escherichia coli EPEC 1668-4a	EPEC 1668-4a		SAMN21210958	GCA_021504115.1		JAJIYZ000000000	273	5113525	2020	Australia
Escherichia coli ARS-CC11325	ARS-CC11325		SAMN21542757	GCA_021108825.1		JAJODX000000000	641	5188806	2015	USA	Bos taurus	Cow
Escherichia coli 231228			SAMN05163794		SRR3574317		353	5051697
Escherichia coli DEC9A	DEC9A		SAMN00190967	GCA_000249895.2	SRR094970	AIGK00000000	80	5408446	1961	USA: WI	Human, Homo sapiens	Human
Escherichia coli DEC9B	DEC9B		SAMN00190968	GCA_000249915.2	SRR094964,SRR094965	AIGL00000000	64	5361604	1979	USA: NH	Human, Homo sapiens	Human
Escherichia coli DEC9C	DEC9C		SAMN00190970	GCA_000249935.2	SRR094966,SRR094967	AIGM00000000	66	5194722	1952	Switzerland	Human, Homo sapiens	Human
Escherichia coli DEC9E	DEC9E		SAMN00217320	GCA_000249975.2	SRR124112,SRR124113,SRR124114	AIGO00000000	68	5430771	1986	Mexico	Human, Homo sapiens	Human
Escherichia coli DEC10A	DEC10A		SAMN00190964	GCA_000249995.2	SRR094960,SRR094961	AIGP00000000	76	5368171		United Kingdom	Human, Homo sapiens	Human
Salmonella enterica subsp. enterica serovar Typhi MCC2873	MCC2873				ERR4010142		339	5140437		Nairobi	Human, Homo sapiens		F
